# Supplementary material for: Intrauterine Blood Plasma Platelet-Therapy Mitigates Persistent Breeding-Induced Endometritis, Reduces Uterine Infections, and Improves Embryo Recovery in Mares
Source: MDPI journal article supplement (doi:10.3390/antibiotics10050490), 2021-04-23
Supplement: s1 [file s1]

# Intrauterine Blood Plasma Platelet-Therapy Mitigates Persistent Breeding-Induced Endometritis, Reduces Uterine Infections, and Improves Embryo Recovery in Mares

Lorenzo G. T. M. Segabinazzi <sup>1,2,5</sup>, Igor F. Canisso <sup>1,\*</sup>, Giorgia Podico <sup>1</sup>, Lais L. Cunha <sup>1</sup>, Guilherme Novello <sup>1,2</sup>, Michael F. Rosser <sup>3</sup>, Shavahn C. Loux <sup>4</sup>, Fabio S. Lima <sup>1,6</sup> and Marco A. Alvarenga <sup>2</sup>

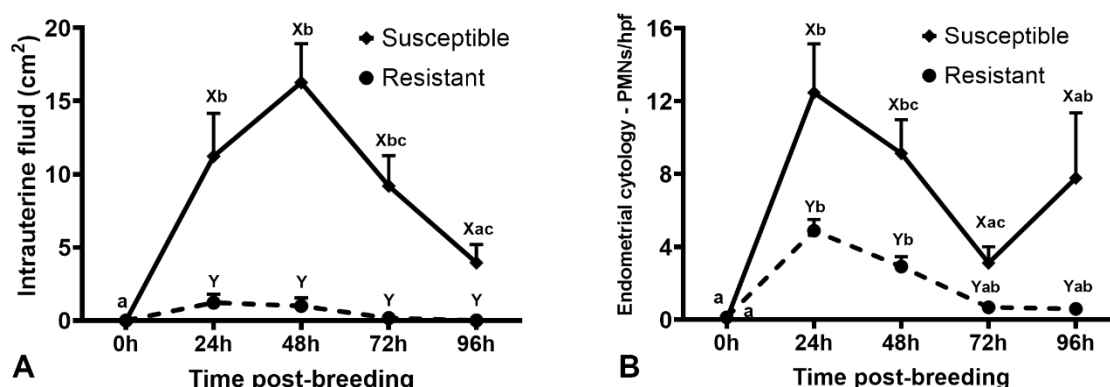

**Figure S1.** The post-breeding inflammatory response in mares after the sperm challenging. Mares were categorized as susceptible ( $n = 12$ ) and resistant ( $n = 7$ ) to persistent-breeding induced endometritis (PBIE) immediately pre-(0h) and post-sperm challenging (24–96h). (A) Intrauterine fluid accumulation measured at the uterine bifurcation; (B) Mean PMNs counted in endometrial cytology in five high-power fields (hpf). Different superscripts denote the effects of time ( $^{abc}$ ) and differences between mares within each time point ( $^{xy}$ ) ( $P < 0.05$ ).

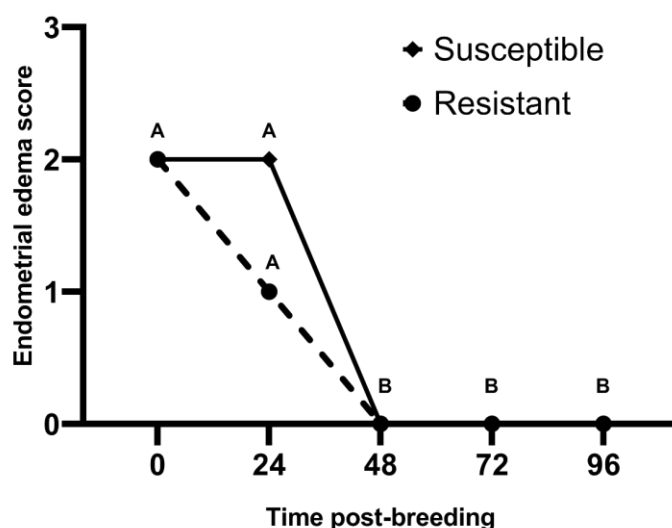

**Figure S2.** Endometrial edema score (median) in mares after the sperm challenging. Mares were categorized as susceptible ( $n = 12$ ) and resistant ( $n = 7$ ) to persistent-breeding induced endometritis (PBIE) immediately pre-(0h) and post-sperm challenging (24–96h). Score 0, No edema; 1, Mild edema; 2, Moderate edema; 3, Evident edema; 4, Exacerbated edema. Different superscripts denote the effects of time ( $^{A,B}$ ) ( $P < 0.05$ ).

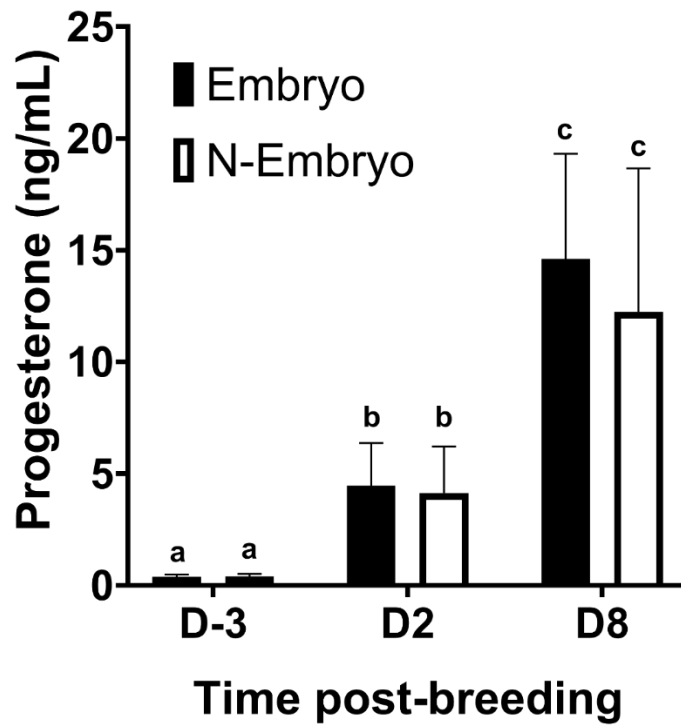

**Figure S3.** Circulating progesterone concentrations pre- and post-ovulation in mares susceptible to persistent breeding-induced endometritis with a positive (Embryo) or negative (N-Embryo) embryo flushing at eight days post-ovulation. Assessments were carried out from the early onset of estrus (D-3), 48 h post-ovulation (D2) and on the day of embryo flushing, eight days post-ovulation (D8).

**Table S1.** Semen parameters for the breeding doses used for breeding mares assigned to (Control), platelet-rich (PRP), or -poor plasma (PPP). All ejaculates (n = 26) were obtained from a single fertile stallion.

| Parameters                                     | Control    | PRP        | PPP        |
|------------------------------------------------|------------|------------|------------|
| Volume (mL)                                    | 13.3 ± 1.0 | 15.4 ± 1.3 | 14.7 ± 0.9 |
| Total sperm concentration (× 10 <sup>9</sup> ) | 2.7 ± 0.14 | 2.5 ± 0.15 | 2.6 ± 0.9  |
| Total motility (%)                             | 80.5 ± 1.7 | 80.3 ± 2.1 | 81.0 ± 1.0 |
| Progressive motility (%)                       | 74.0 ± 2.0 | 74.4 ± 2.0 | 75.0 ± 1.4 |

Data represented as Mean ± SEM.
